# Supplementary material for: Acupuncture Therapy for Military Veterans Suffering from Posttraumatic Stress Disorder and Related Symptoms: A Scoping Review of Clinical Studies
Source: MDPI journal article supplement (doi:10.3390/healthcare11222957), 2023-11-14
Supplement: s1 [file s1]

**Table S1. Search terms used in each database**

**Medline via PubMed**

|    | Searches                                                                                                                                                                                                                                                                                                               | Results |
|----|------------------------------------------------------------------------------------------------------------------------------------------------------------------------------------------------------------------------------------------------------------------------------------------------------------------------|---------|
| #1 | ("War Exposure[MeSH]" OR "Armed Conflicts" [MeSH] OR "Veterans"[MeSH] OR "Military Personnel"[MeSH] OR "Combat Disorders"[MeSH] OR War exposure[Title/abstract] OR Armed Conflicts[Title/abstract] OR Veterans[Title/abstract] OR Military Personnel[Title/abstract] OR war[Title/abstract] OR Combat[Title/abstract]) | 156,702 |
| #2 | ("Acupuncture Therapy"[MeSH] OR "Acupuncture, Ear"[MeSH] OR "Acupuncture Points"[MeSH] OR "Acupuncture"[MeSH] OR "Electroacupuncture"[MeSH] OR "Meridians"[MeSH] OR acupuncture[Title/abstract] OR electroacupuncture[Title/abstract] OR electroacupuncture[Title/abstract] OR acupoint*[Title/abstract])              | 35,301  |
| #3 | #1 AND #2                                                                                                                                                                                                                                                                                                              | 179     |

**EMBASE via Elsevier**

|    | Searches                                                                                                                                                                                                                                                                                                                            | Results |
|----|-------------------------------------------------------------------------------------------------------------------------------------------------------------------------------------------------------------------------------------------------------------------------------------------------------------------------------------|---------|
| #1 | war exposure/exp OR war exposure:ab,ti OR armed conflicts:ab,ti OR war/exp OR war:ab,ti OR Veterans/exp OR Veterans:ab,ti OR Military Personnel/exp OR Military Personnel:ab,ti OR Combat Disorders/exp OR Combat:ab,ti)                                                                                                            | 178,876 |
| #2 | ('acupuncture'/exp OR 'acupuncture' OR 'acupuncture therapy' OR 'auricular acupuncture'/exp OR 'auricular acupuncture' OR 'ear acupuncture' OR 'acupuncture point'/exp OR 'acupuncture point' OR 'electroacupuncture'/exp OR 'electroacupuncture' OR 'electro-acupuncture' OR 'body meridian'/exp OR 'body meridian' OR 'acupoint') | 62,049  |
| #3 | #1 AND #2                                                                                                                                                                                                                                                                                                                           | 409     |

**CENTRAL**

|     | Searches                                                                                                                                                                        | Results |
|-----|---------------------------------------------------------------------------------------------------------------------------------------------------------------------------------|---------|
| #1  | MeSH descriptor: [Armed Conflicts] explode all trees                                                                                                                            | 155     |
| #2  | MeSH descriptor: [Veterans] explode all trees                                                                                                                                   | 1150    |
| #3  | MeSH descriptor: [Military Personnel] explode all trees                                                                                                                         | 1039    |
| #4  | MeSH descriptor: [Combat Disorders] explode all trees                                                                                                                           | 132     |
| #5  | MeSH descriptor: [War Exposure] explode all trees                                                                                                                               | 22      |
| #6  | (armed conflicts OR veterans OR military personnel OR combat OR war OR war exposure):ti,ab,kw                                                                                   | 9508    |
| #7  | #1 OR #2 OR #3 OR #4 OR #5 OR #6                                                                                                                                                | 9521    |
| #8  | MeSH descriptor: [Acupuncture] explode all trees                                                                                                                                | 161     |
| #9  | MeSH descriptor: [Acupuncture Therapy] explode all trees                                                                                                                        | 5208    |
| #10 | MeSH descriptor: [Acupuncture, Ear] explode all trees                                                                                                                           | 213     |
| #11 | MeSH descriptor: [Electroacupuncture] explode all trees                                                                                                                         | 875     |
| #12 | (Acupuncture OR Pharmacopuncture OR Ear acupuncture OR Pharmacopuncture OR Electroacupuncture OR Acupotomy OR Acupotomies OR Ear acupuncture OR Auricular acupuncture):ti,ab,kw | 17184   |
| #13 | #8 OR #9 OR #10 OR #11 OR #12                                                                                                                                                   | 17316   |
| #14 | #7 AND #13 in Trials                                                                                                                                                            | 60      |

**AMED via EBSCO**

|    | Searches                                                                                                                            | Results |
|----|-------------------------------------------------------------------------------------------------------------------------------------|---------|
| #1 | (war exposure[TX] OR war[TX] OR armed conflicts[TX] OR veterans[TX] OR military personnel[TX] OR combat disorder[TX] OR combat[TX]) | 2556    |

|    |                                                                                                                                                                                                                                          |       |
|----|------------------------------------------------------------------------------------------------------------------------------------------------------------------------------------------------------------------------------------------|-------|
| #2 | ("Acupuncture Therapy"[SU] OR "Acupuncture, Ear"[SU] OR "Acupuncture Points"[SU] OR Acupuncture[SU] OR Electroacupuncture[SU] OR Meridians[SU] OR acupuncture[TX] OR electroacupuncture[TX] OR electro-acupuncture[TX] OR acupoint*[TX]) | 12099 |
| #3 | #1 AND #2                                                                                                                                                                                                                                | 31    |

### CINAHL via EBSCO

|    | Searches                                                                                                                                                                                                                     | Results |
|----|------------------------------------------------------------------------------------------------------------------------------------------------------------------------------------------------------------------------------|---------|
| #1 | (MH "War+") OR (MH "Veterans+") OR (MH "Military personnel+") OR (TX war exposure) OR (TX war) OR (TX armed conflicts) OR (TX veterans) OR (TX military personnel) OR (TX combat disorder) OR (TX combat)                    | 122,841 |
| #2 | (MH "Acupuncture+") OR (MH "Acupuncture, Ear+") OR (MH "Acupuncture Points+") OR (MH "Electroacupuncture") OR (MH "Meridians+") OR (TX acupuncture) OR (TX electroacupuncture) OR (TX electro-acupuncture) OR (TX acupoint*) | 35,048  |
| #3 | #1 AND #2                                                                                                                                                                                                                    | 1176    |

### PsycARTICLES via ProQuest

|    | Searches                                                                                                                                                                                                                                                     | Results |
|----|--------------------------------------------------------------------------------------------------------------------------------------------------------------------------------------------------------------------------------------------------------------|---------|
| #1 | MAINSUBJECT.EXACT.EXPLODE("Military Personnel") OR MAINSUBJECT.EXACT.EXPLODE("Military Veterans") OR MAINSUBJECT.EXACT.EXPLODE("Combat Experience") OR war exposure OR war OR armed conflicts OR veterans OR military personnel OR combat disorder OR combat |         |
| #2 | MAINSUBJECT.EXACT.EXPLODE("Acupuncture") OR acupuncture OR acupuncture therapy OR (ear acupuncture) OR (acupuncture points) OR acupoint* OR electroacupuncture OR electro-acupuncture OR meridians                                                           |         |
| #3 | #1 AND #2                                                                                                                                                                                                                                                    |         |

### OASIS

|    | Searches                            | Results |
|----|-------------------------------------|---------|
| #1 | (전쟁 OR 전투 OR 무력충돌 OR 군대 OR 군인)AND 침 | 1       |

### KCI

|    | Searches                            | Results |
|----|-------------------------------------|---------|
| #1 | (전쟁 OR 전투 OR 무력충돌 OR 군대 OR 군인)AND 침 | 32      |

### CNKI

|    | Searches                                                            | Results |
|----|---------------------------------------------------------------------|---------|
| #1 | (SU='战争'+ '战斗'+ '武装冲突'+ '军队'+ '军人')AND (SU='acupuncture'+ '针'+ '鍼') | 99      |

### Wanfang data

|    | Searches                                           | Results |
|----|----------------------------------------------------|---------|
| #1 | ((((主题=战争) OR 主题=战斗) OR 主题=武装冲突) OR 主题=军队) OR 主题=军 | 5178    |

|  |                                             |  |
|--|---------------------------------------------|--|
|  | 人) AND (((主题=acupuncture) OR 主题=针) OR 主题=鍼) |  |
|--|---------------------------------------------|--|

## VIP

|    | Searches                                                       | Results   |
|----|----------------------------------------------------------------|-----------|
| #1 | M=(战争 OR 战斗 OR 武装冲突 OR 军队 OR 军人) AND M=(acupuncture OR 针 OR 鍼) | <b>42</b> |

| CiNii | Searches                                                   | Results    |
|-------|------------------------------------------------------------|------------|
| #1    | (戦争 OR 戦闘 OR 武力衝突 OR 軍隊 OR 軍人) AND (acupuncture OR 針 OR 鍼) | <b>229</b> |
