# Supplementary material for: Acupuncture Therapy for Military Veterans Suffering from Posttraumatic Stress Disorder and Related Symptoms: A Scoping Review of Clinical Studies
Source: MDPI journal article supplement (doi:10.3390/healthcare11222957), 2023-11-14
Supplement: s1 [file s1]

**Table S2: List of Retrieved Full-Text Articles and Exclusion Reasons**

| Author       |      | Title                                                                                                                                                                | inclusion | exclusion reason           |
|--------------|------|----------------------------------------------------------------------------------------------------------------------------------------------------------------------|-----------|----------------------------|
| Eisenlohr    | 2010 | Acupuncture - A new option in the therapy of traumatized German soldiers?                                                                                            | O         |                            |
| Hull         | 2012 | Acupuncture and meditation for military veterans: Patient satisfaction and self reported symptom reduction                                                           | X         | Inappropriate participant  |
| Arhin        | 2016 | Acupuncture as a Treatment Option in Treating Posttraumatic Stress Disorder-related Tinnitus in War Veterans                                                         | O         |                            |
| King         | 2013 | Acupuncture for sleep disturbances in veterans with post traumatic stress disorder                                                                                   | X         | Duplicate                  |
| Niemtzow     | 2013 | Acupuncture and its role in natural cataclysmic disasters and armed conflicts                                                                                        | X         | Review article             |
| Huang        | 2018 | Acupuncture for treatment of persistent disturbed sleep: a randomized clinical trial in veterans with mild traumatic brain injury and post-traumatic stress disorder | O         |                            |
| King         | 2015 | Auricular acupuncture for sleep disturbance in veterans with post-traumatic stress disorder: a feasibility study                                                     | O         |                            |
| Shao         | 2018 | Battlefield Acupuncture (BFA) for pain management in a VA community living and rehabilitation center                                                                 | X         | Inappropriate participant  |
| Chang        | 2010 | AOM program helps vets recover from PTSD                                                                                                                             | X         | Review article             |
| Amini Rarani | 2021 | Effects of acupressure at the P6 and LI4 points on the anxiety level of soldiers in the Iranian military                                                             | X         | Inappropriate intervention |
| Libretto     | 2014 | Evaluation of an integrative PTSD treatment program                                                                                                                  | X         | Inappropriate participant  |
| Cronin       | 2013 | Evaluation of the national acupuncture detoxification association protocol to treat combat stress induced insomnia                                                   | O         |                            |
| King         | 2016 | Exploring Self-Reported Benefits of Auricular Acupuncture Among Veterans With Posttraumatic Stress Disorder                                                          | O         |                            |
| Prisco       | 2013 | Group auricular acupuncture for PTSD-related insomnia in veterans: A randomized trial                                                                                | O         |                            |
| Conboy       | 2014 | Management of gulf war syndrome symptoms with acupuncture: Findings of a wait-list controlled RCT                                                                    | X         | no outcome data            |
| Vitzthum     | 2018 | of post-traumatic stress disorder in soldiers and peacekeepers                                                                                                       | X         | Review article             |

|                |      |                                                                                                                                                                                 |   |                            |
|----------------|------|---------------------------------------------------------------------------------------------------------------------------------------------------------------------------------|---|----------------------------|
| Conboy         | 2009 | Management of gulf war syndrome symptoms with acupuncture: Report on preliminary findings of an ongoing wait-list control RCT                                                   | X | Abstract                   |
| Engel          | 2014 | Randomized effectiveness trial of a brief course of Acupuncture for posttraumatic stress disorder                                                                               | O |                            |
| Schnyer        | 2012 | The effectiveness of acupuncture in the treatment of Gulf War Illness                                                                                                           | X | Inappropriate participant  |
| Yurasek        | 2011 | Acupuncture for PTSD in War Veterans                                                                                                                                            | X | Review article             |
| Fried          | 2012 | Acupuncturists Without Borders: Disaster Relief; Community Clinics and Long-Term Trauma Recovery Through Acupuncture                                                            | X | Review article             |
| Nct.           | 2009 | Acupuncture for soldiers and veterans                                                                                                                                           | X | Review article             |
| Geib           | 2019 | Acupuncture in veterans with permanent sleep disorders after mild traumatic brain injury                                                                                        | X | Inappropriate participant  |
| Taylor-Swanson | 2019 | Matrix Analysis of Traditional Chinese Medicine Differential Diagnoses in Gulf War Illness                                                                                      | X | Inappropriate outcome      |
| Smeeding       | 2010 | Outcome evaluation of the Veterans Affairs Salt Lake City Integrative Health Clinic for chronic pain and stress-related depression, anxiety, and post-traumatic stress disorder | X | Inappropriate intervention |
| Silverstein    | 2015 | Treating Our Veterans with PTSD                                                                                                                                                 | X | Review article             |
| Chang          | 2009 | Weighing the costs: integrative PTSD programs for veterans                                                                                                                      | X | Inappropriate outcome      |
| 趙名娟            | 2011 | 軍事應激下軍人心理狀態變化及中西醫結合干預? 究                                                                                                                                                        | X | Inappropriate participant  |
| 趙名娟            | 2011 | 針灸聯合腦波治療儀干預軍人心理應激反應33例分析                                                                                                                                                        | X | Inappropriate participant  |
| 赵璐             | 2014 | 针灸在中外军队的应用与研究                                                                                                                                                                   | X | Review article             |
| 权青云            | 2014 | 暗示及针灸治疗癔症性失语12例疗效观察                                                                                                                                                             | X | Inappropriate participant  |
| 钟周             | 2015 | 针刺联合团体性心理护理对优抚军人慢性疼痛伴发情绪障碍的效果观察                                                                                                                                                 | X | Inappropriate outcome      |
| 郭宏伟            | 2021 | 中医药拮抗创伤后应激障碍的研究现状                                                                                                                                                               | X | Review article             |
