# Supplementary material for: Acupuncture Therapy for Military Veterans Suffering from Posttraumatic Stress Disorder and Related Symptoms: A Scoping Review of Clinical Studies
Source: Healthcare (Basel). 2023 Nov 14;11(22):2957. doi: 10.3390/healthcare11222957 (PMC10671227; doi:10.3390/healthcare11222957)
Supplement: Supplementary file 1 [file healthcare-11-02957-s001.zip]

Archive with 4 entries (4 files):
- Certificate_of_editing-PESUY_8_4_injczkqacw.pdf
- Table S1.pdf
- Table S2.pdf
- Table S3.pdf
